# Supplementary material
Source: PubMed Central journal article supplement (PMC5108066)

CD33<sup>+</sup>CD16<sup>+</sup> NK cells (lower right side panel). These cell populations were analysed for HLA-DR (vertical axis) and GPI-80 (horizontal axis) expression.

3) In the reference 9, Solito et al. showed six types of MDSCs in these RCC patients. If authors had studied this kind of patients, those types of MDSCs could have analyzed to validate GPI-80 expression.

According to the reviewer's suggestion, we summarized the association between the previously used marker and GPI-80 expression as follows (please see the results section, pp 24, line 18~pp 25, line 3, and supplemental Table 1):

Based on these observations, we summarized the association between reported MDSC markers and GPI-80 expression in Suppl. Table 1. The observations of GPI-80 CV in CD16<sup>hi</sup> and GPI-80 MFI in CD33<sup>hi</sup> populations were applied to all reported MDSC subsets.

Suppl. Table 1. Association between reported MDSC markers and GPI-80 expression.

| Reported MDSC markers                                                                       | Related population                        | GPI-80 expression                                    |
|---------------------------------------------------------------------------------------------|-------------------------------------------|------------------------------------------------------|
| CD14 <sup>+</sup> IL-4R $\alpha$ <sup>+</sup>                                               | CD33 <sup>hi</sup>                        | GPI-80 <sup>+</sup> *                                |
| CD33 <sup>+</sup> HLA-DR <sup>-</sup>                                                       | CD33 <sup>hi</sup> and CD16 <sup>hi</sup> | GPI-80 <sup>+</sup> * and<br>GPI-80 <sup>++</sup> ** |
| CD11b <sup>+</sup> CD14 <sup>+</sup> CD33 <sup>+</sup>                                      | CD33 <sup>hi</sup>                        | GPI-80 <sup>+</sup> *                                |
| CD33 <sup>+</sup> HLA-DR <sup>-</sup> CD15 <sup>+</sup>                                     | CD16 <sup>hi</sup>                        | GPI-80 <sup>++</sup> **                              |
| CD15 <sup>+</sup> IL-4R $\alpha$ <sup>+</sup>                                               | CD16 <sup>hi</sup>                        | GPI-80 <sup>++</sup> **                              |
| CD11b <sup>+</sup> CD15 <sup>+</sup> CD66b <sup>+</sup>                                     | CD16 <sup>hi</sup>                        | GPI-80 <sup>++</sup> **                              |
| CD11b <sup>+</sup> CD14 <sup>-</sup> CD15 <sup>+</sup>                                      | CD16 <sup>hi</sup>                        | GPI-80 <sup>++</sup> **                              |
| CD15 <sup>+</sup> CFCS <sup>lo</sup> SSC <sup>hi</sup>                                      | CD16 <sup>hi</sup>                        | GPI-80 <sup>++</sup> **                              |
| CD11c <sup>bright</sup> CD62L <sup>dim</sup> CD11b <sup>bright</sup> CD16 <sup>bright</sup> | CD16 <sup>hi</sup>                        | GPI-80 <sup>++</sup> **                              |

\*MFI of GPI-80<sup>+</sup> (intermediate) cells, which increases during the appearance of MDSCs, indicates an increase in ROS production and potency.

\*\*CV of GPI-80<sup>++</sup> (high) cells, which increases during the appearance of MDSCs, suggests increasing the capability to suppress T cell proliferation.

1  
2  
3  
4  
5  
6  
7  
8  
9  
10  
11  
12  
13  
14  
15  
16  
17  
18  
19  
20  
21  
22  
23  
24  
25  
26  
27  
28  
29  
30  
31  
32  
33  
34  
35  
36  
37  
38  
39  
40  
41  
42  
43

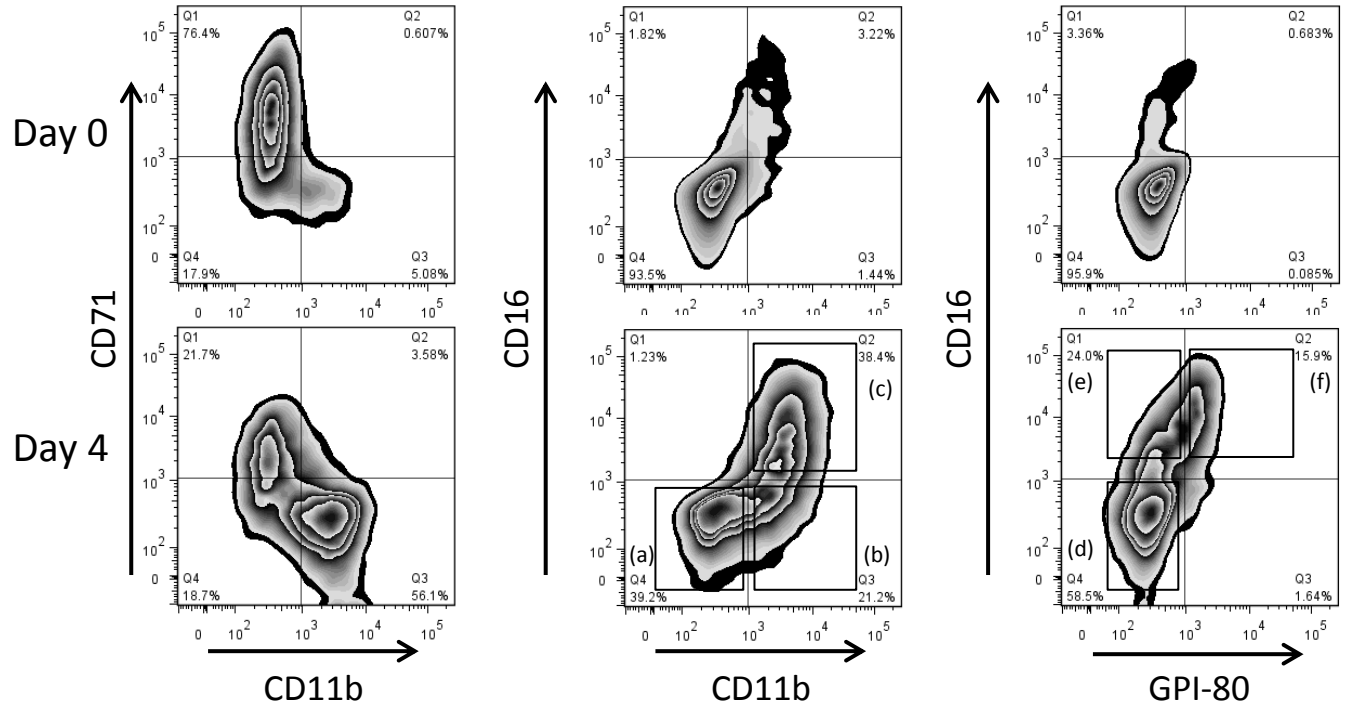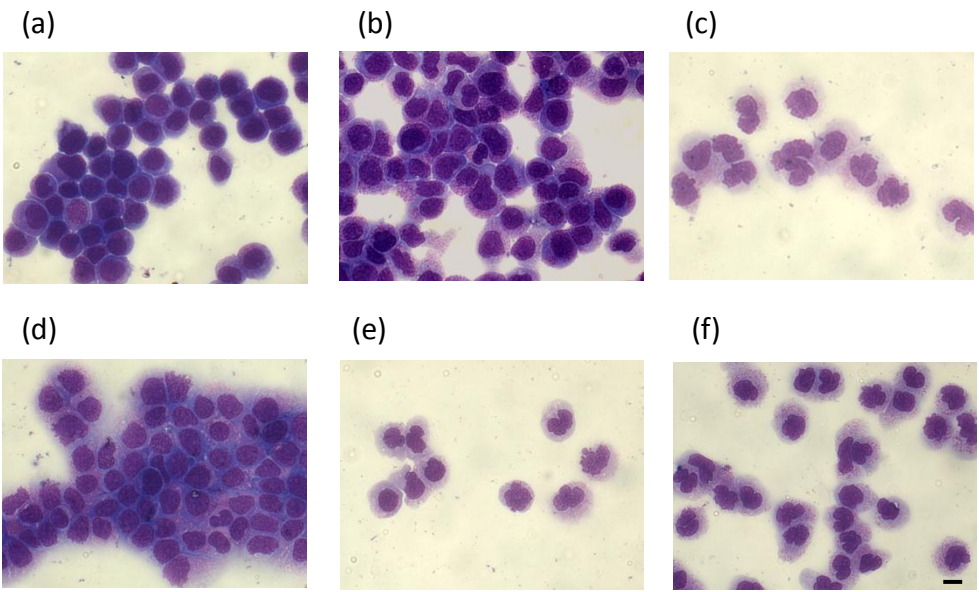

Suppl. Fig.1

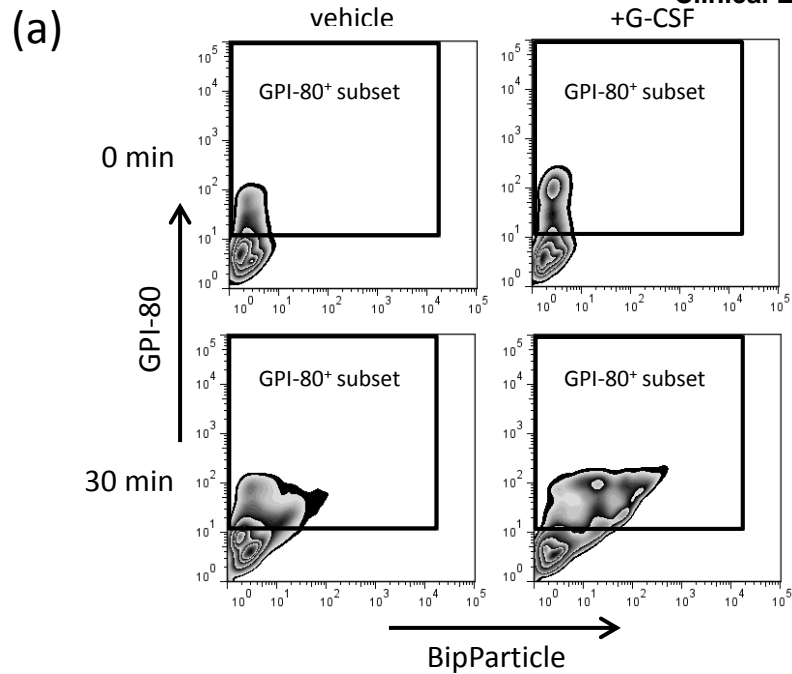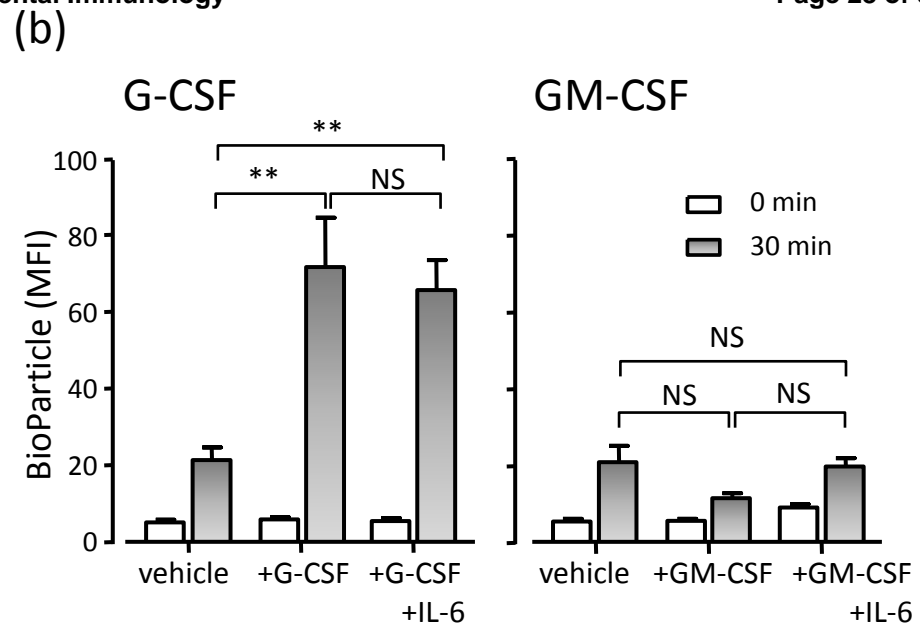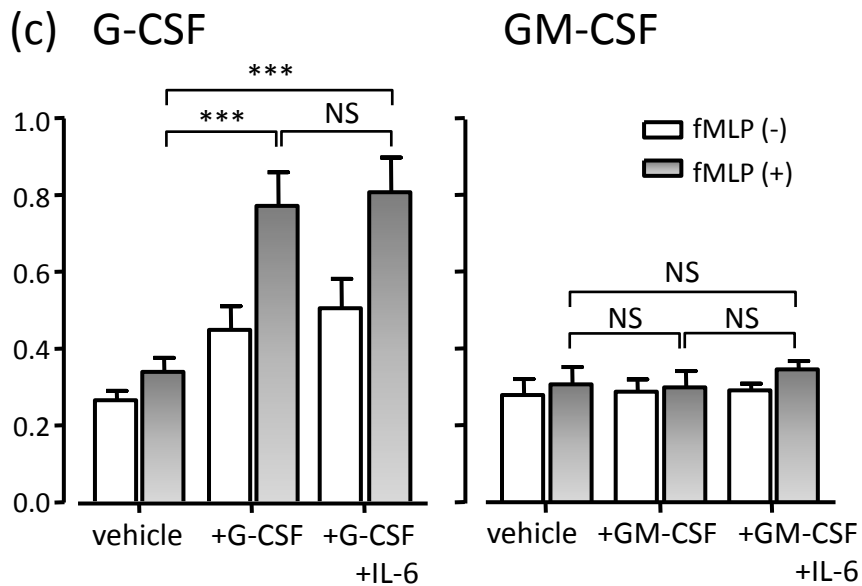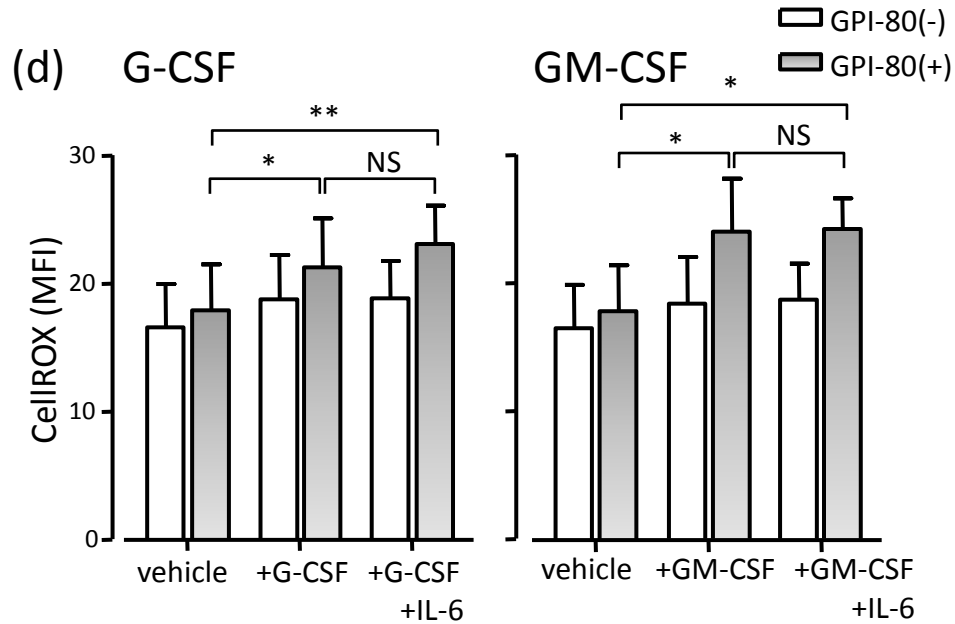

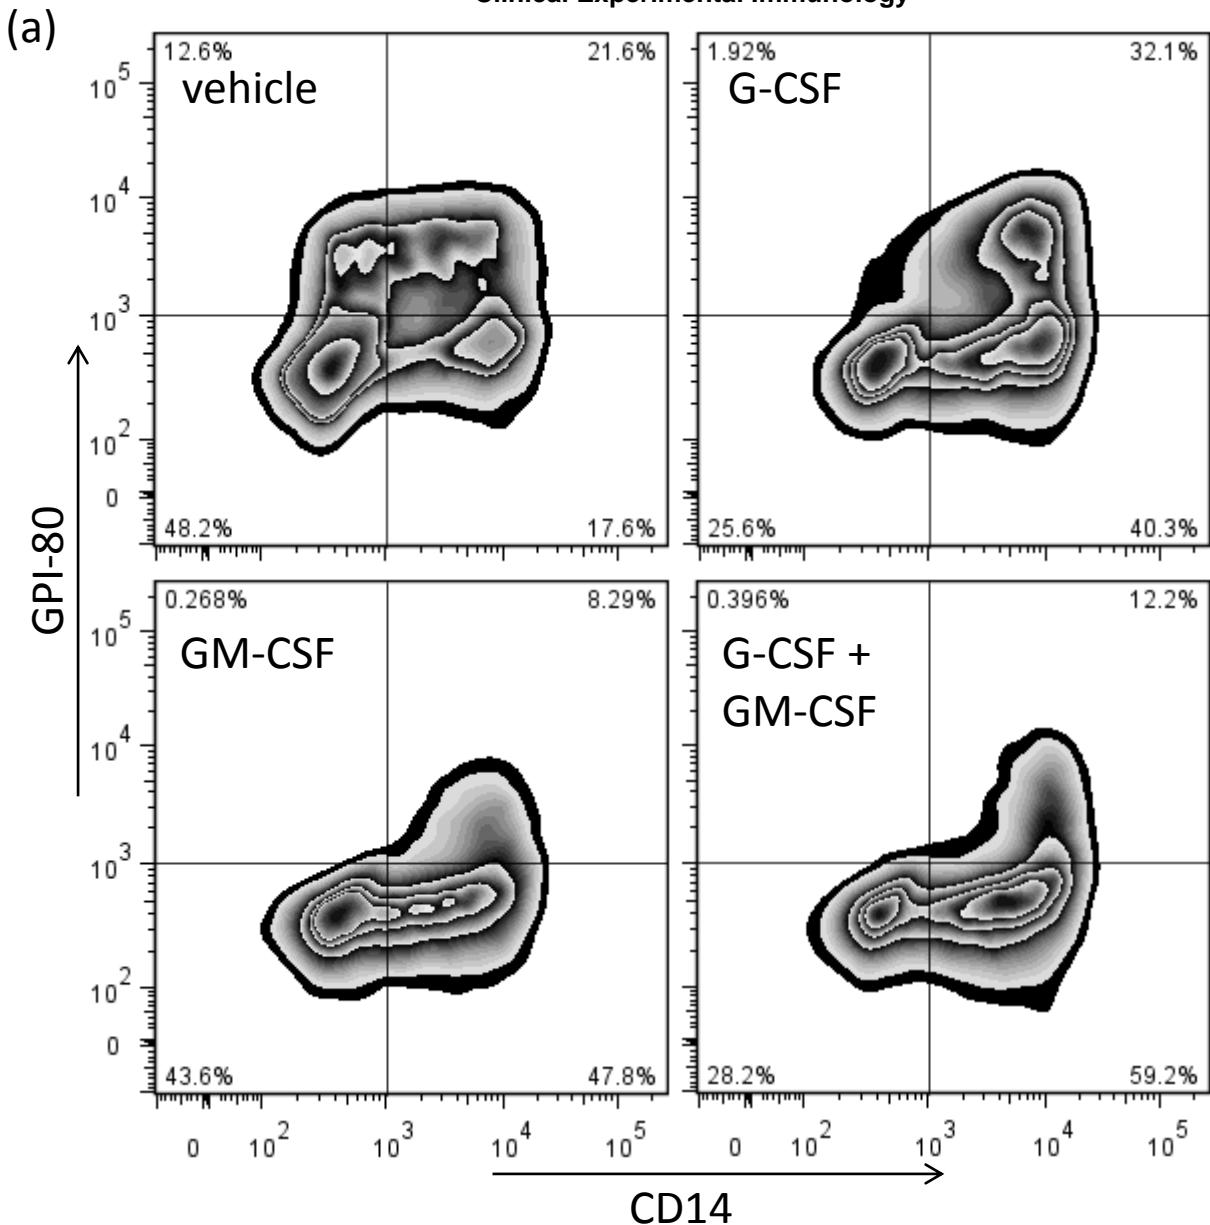

1  
2  
3  
4  
5  
6  
7  
8  
9  
10  
11  
12  
13  
14  
15  
16  
17  
18  
19  
20  
21  
22  
23  
24  
25  
26  
27  
28  
29  
30  
31  
32  
33  
34  
35  
36  
37  
38  
39  
40  
41  
42  
43

Suppl. Fig. 3a

(b)

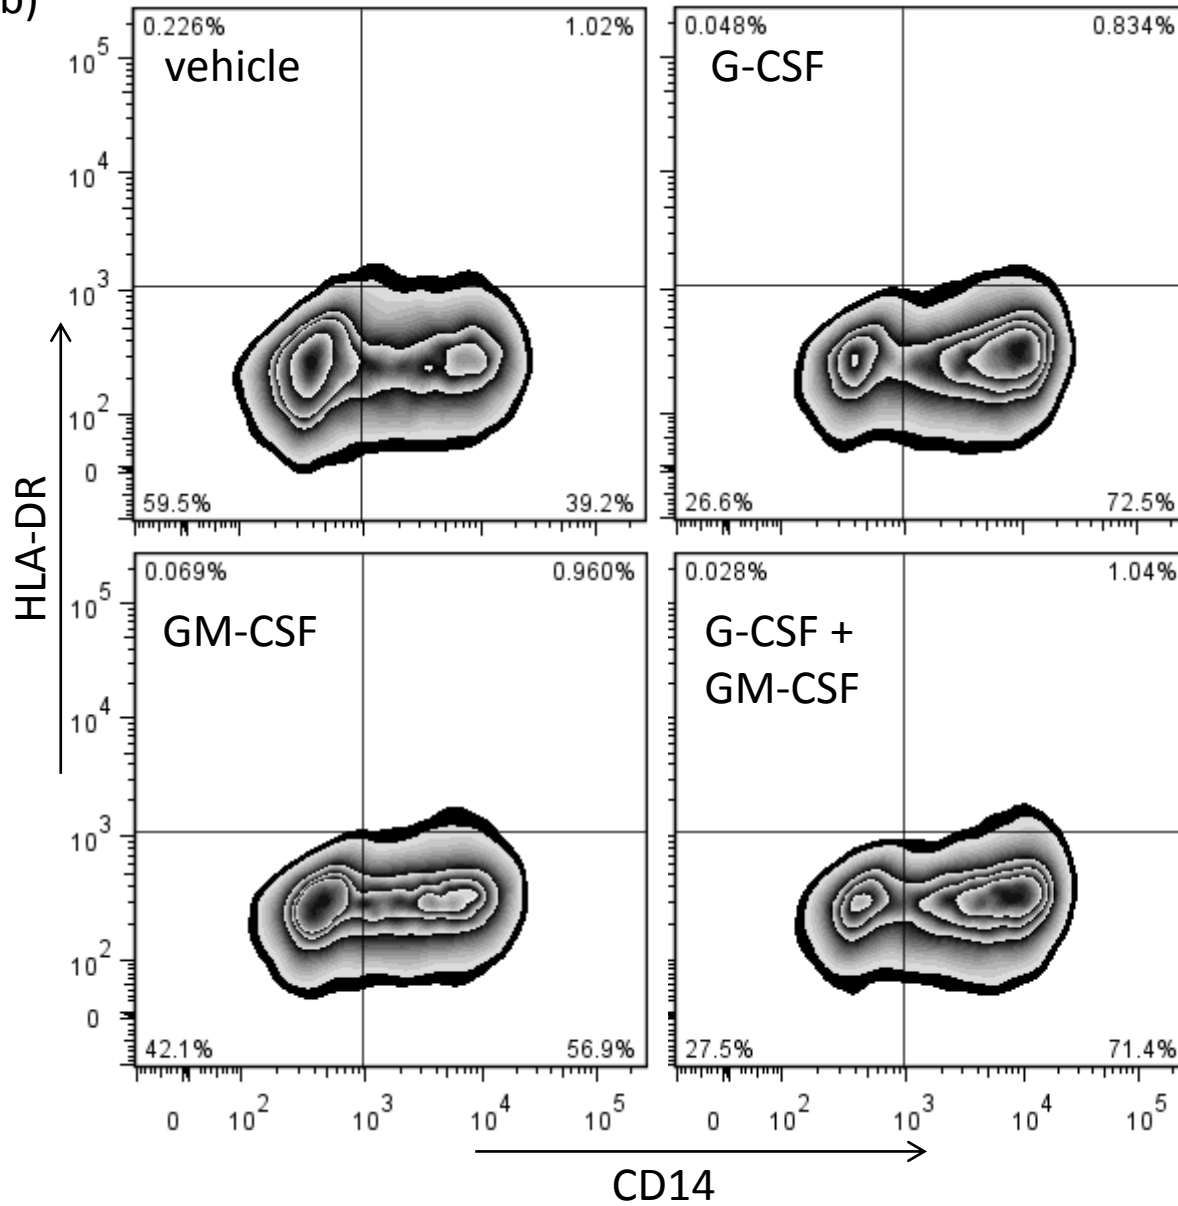

Suppl. Fig. 3b

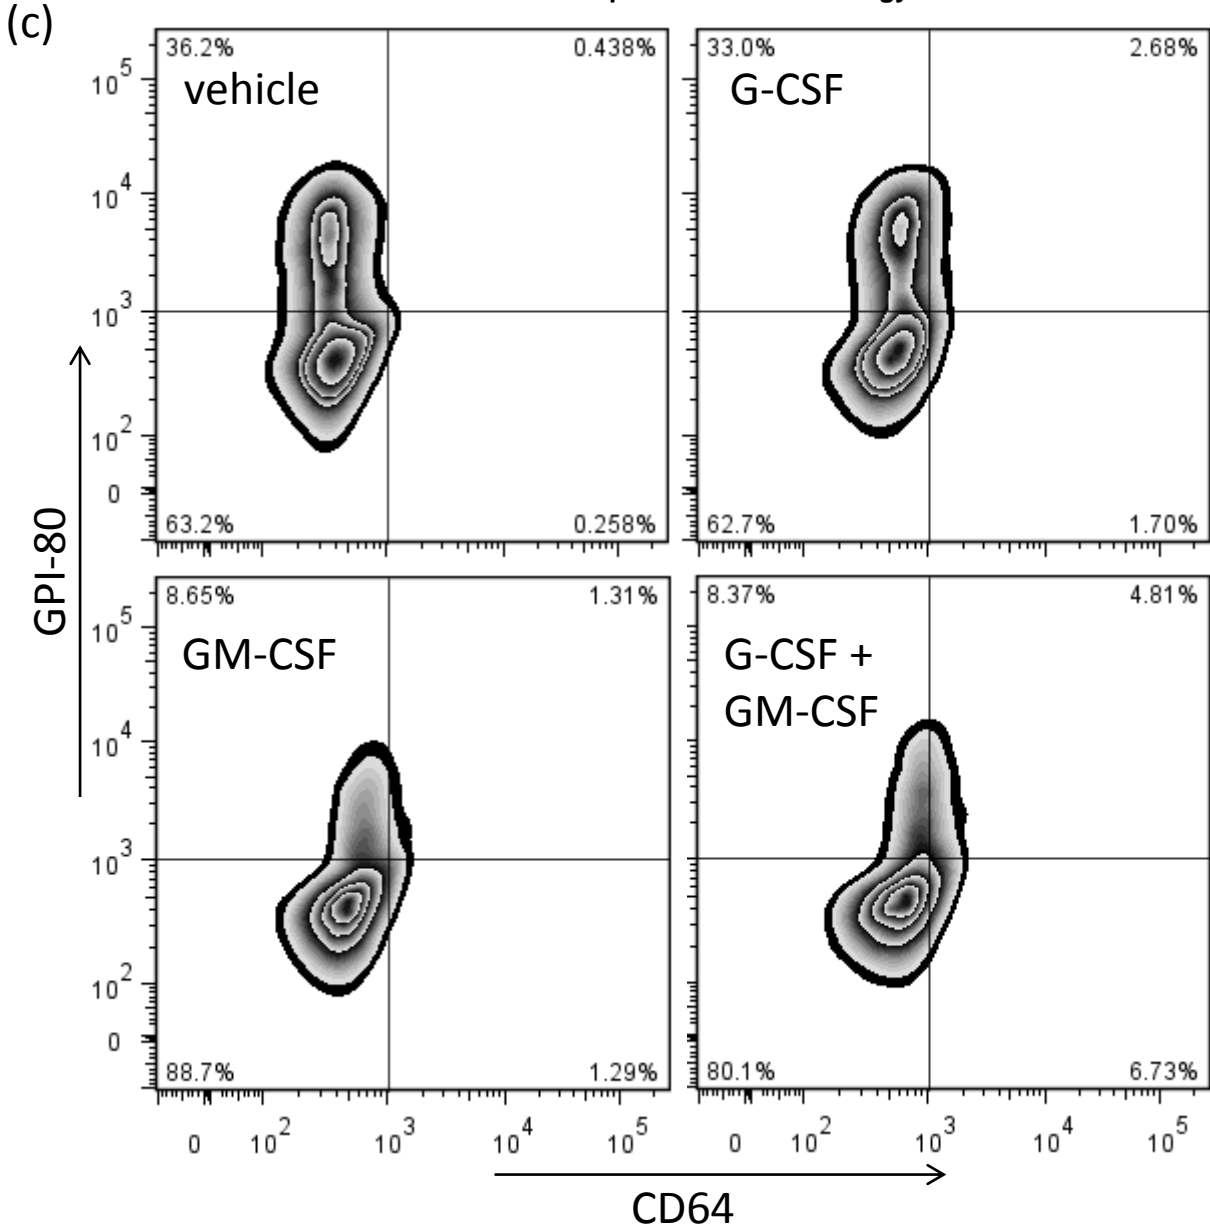

1  
2  
3  
4  
5  
6  
7  
8  
9  
10  
11  
12  
13  
14  
15  
16  
17  
18  
19  
20  
21  
22  
23  
24  
25  
26  
27  
28  
29  
30  
31  
32  
33  
34  
35  
36  
37  
38  
39  
40  
41  
42  
43

Suppl. Fig. 3c

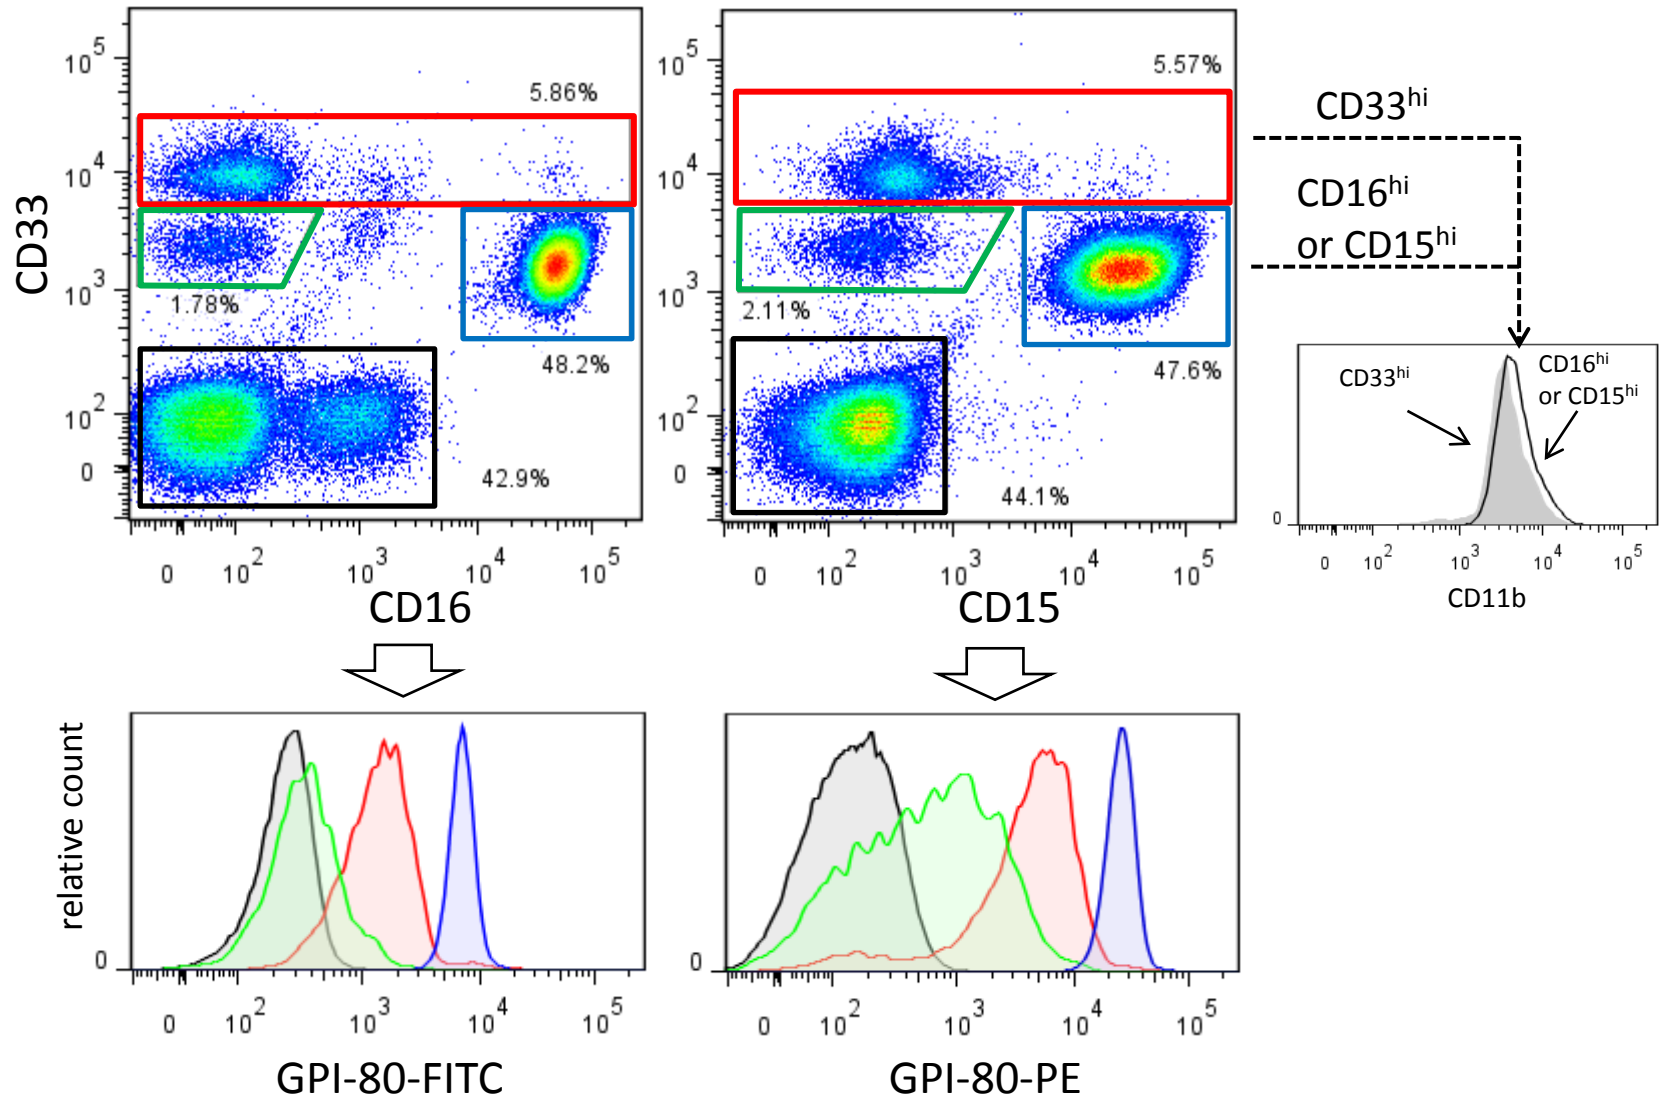

Suppl. Fig. 4

1  
2  
3  
4  
5  
6  
7  
8  
9  
10  
11  
12  
13  
14  
15  
16  
17  
18  
19  
20  
21  
22  
23  
24  
25  
26  
27  
28  
29  
30  
31  
32  
33  
34  
35  
36  
37  
38  
39  
40  
41  
42

1  
2  
3  
4  
5  
6  
7  
8  
9  
10  
11  
12  
13  
14  
15  
16  
17  
18  
19  
20  
21  
22  
23  
24  
25  
26  
27  
28  
29  
30  
31  
32  
33  
34  
35  
36  
37  
38  
39  
40  
41  
42  
43

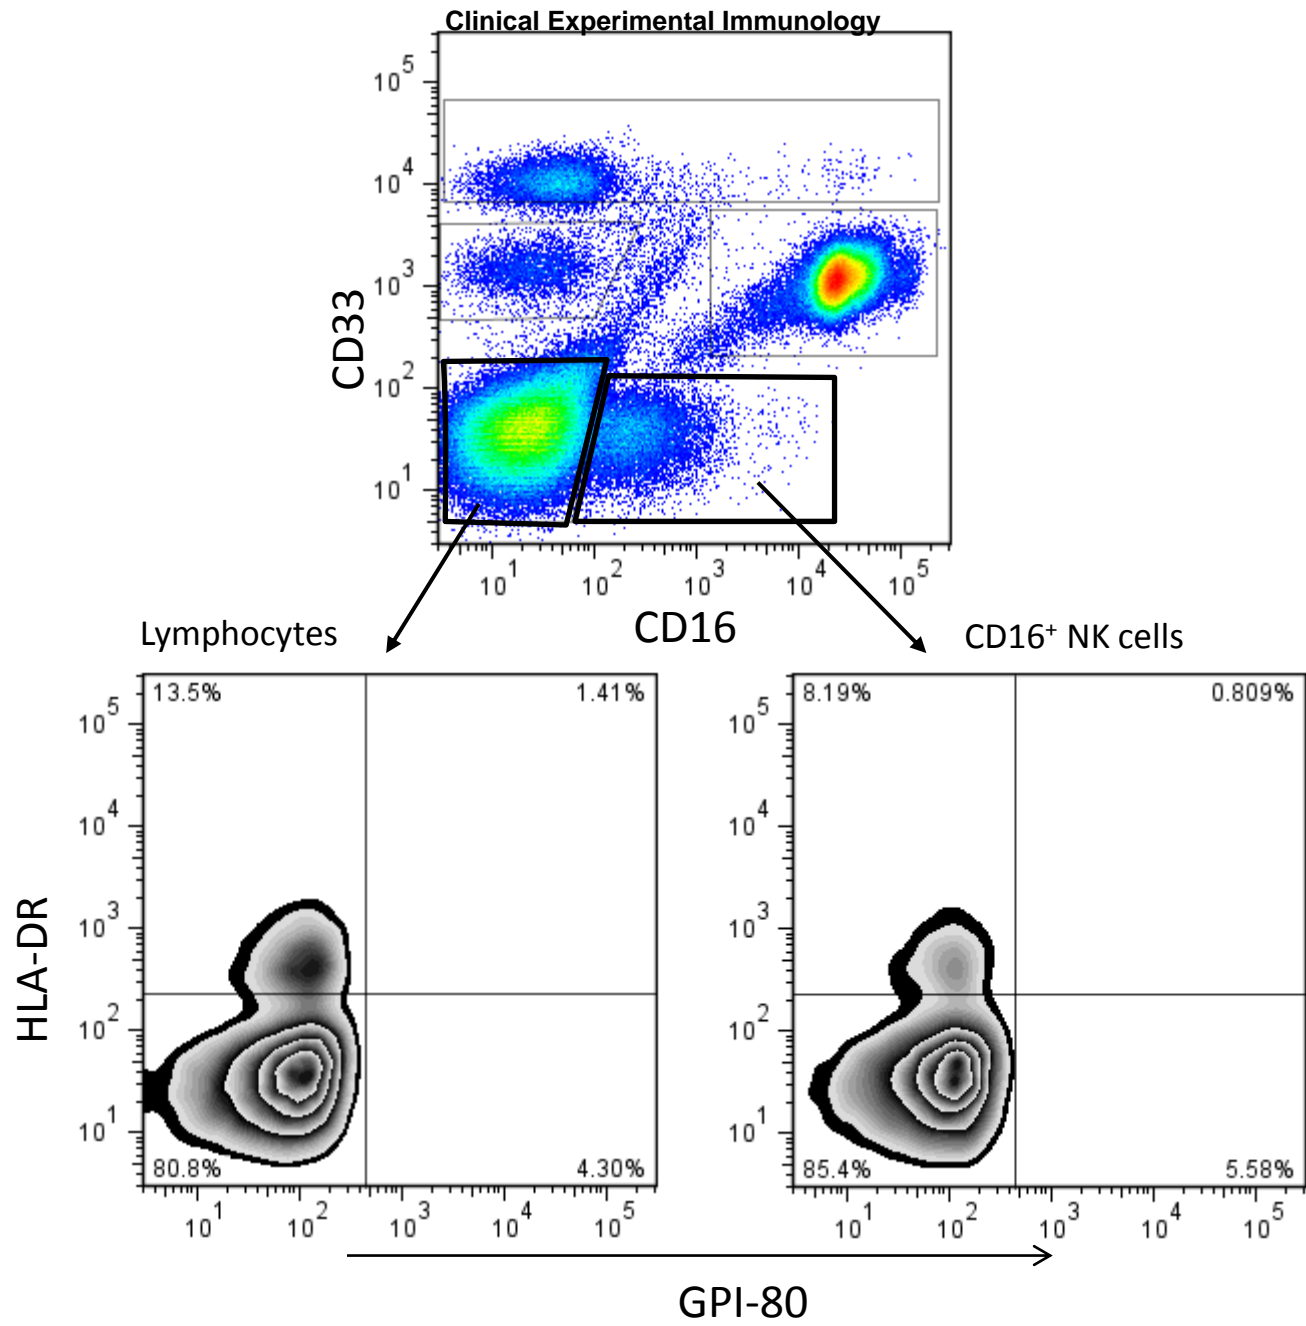

Suppl. Fig. 5



CD33<sup>hi</sup> monocytic cells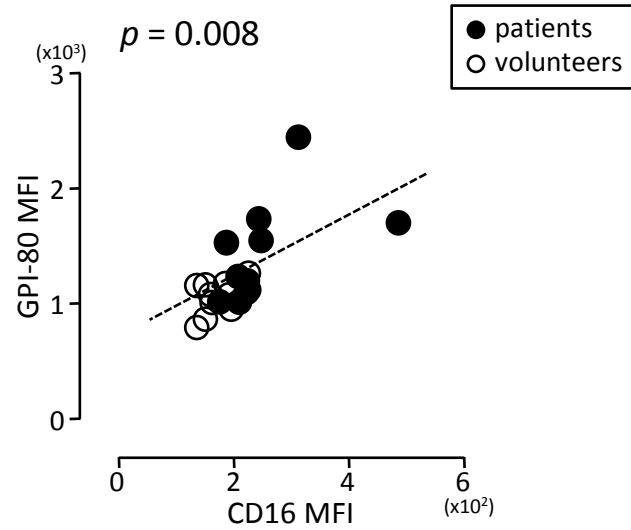

Supplement: CEI-186-373-s001.pdf [file CEI-186-373-s001.pdf]
